# Supplementary material for: Patient and Caregiver Perceptions of Animal Assisted Activity in Orthodontics
Source: MDPI journal article supplement (doi:10.3390/ani12141862), 2022-07-21
Supplement: s1 [file s1]

## Supplemental Tables

**Table S1:** Inclusion and Exclusion Criteria

| Inclusion Criteria *                                                                                                                                                                                                                                         | Exclusion Criteria                                                                                                                                                                                                                                                                                                                                                                                                  |
|--------------------------------------------------------------------------------------------------------------------------------------------------------------------------------------------------------------------------------------------------------------|---------------------------------------------------------------------------------------------------------------------------------------------------------------------------------------------------------------------------------------------------------------------------------------------------------------------------------------------------------------------------------------------------------------------|
| <ul style="list-style-type: none"><li>-Orthodontic patient in the UNC Orthodontics Graduate or Faculty practice (12-17yo or 18+yo)</li><li>OR</li><li>-Parent or caregiver of a minor patient in the UNC Orthodontics Graduate or Faculty Practice</li></ul> | <ul style="list-style-type: none"><li>-Under the age of 12yo</li><li>-Prior participant in the survey</li><li>-Non-fluent English speaker or reader (cannot read English)</li><li>-Does not consent to participate</li><li>-For patients- Not undergoing orthodontic care</li><li>-For caregivers- children not undergoing orthodontic care</li><li>-Only one caregiver per family unit could be included</li></ul> |

\* Participant groups include: orthodontic patients who are minors under 18 (Under 18); adult orthodontic patients over 18 (Over 18); and caregivers including parents and legal guardians of orthodontic patients who are minors (Caregivers).

**Table S2: AAA's Impact on Anxiety and Enjoyment**

| In general, how much do you think a therapy dog in a dental office would alleviate patient anxiety levels (Q11) or affect your experience (Q12)? |               |                |              |              |          |                 |
|--------------------------------------------------------------------------------------------------------------------------------------------------|---------------|----------------|--------------|--------------|----------|-----------------|
|                                                                                                                                                  |               | Reduce         | No Impact    | Increase     | <i>n</i> | <i>p</i> -Value |
| Anxiety (Q11)                                                                                                                                    | Overall       | 81.9%<br>585 ^ | 9.3%<br>66 ^ | 8.8%<br>63 ^ | 714 ^    | 0.850           |
|                                                                                                                                                  | Under 18 **   | 82.5%<br>236   | 6.7%<br>19   | 10.8%<br>31  | 714      | 0.816           |
|                                                                                                                                                  | Over 18 **    | 81.3%<br>156   | 11.5%<br>22  | 7.2%<br>14   |          |                 |
|                                                                                                                                                  | Caregivers ** | 81.8%<br>193   | 10.6%<br>25  | 7.6%<br>18   |          |                 |
|                                                                                                                                                  | Pet dog ^^    | 88.0%<br>381   | 6.2%<br>27   | 5.8%<br>25   | 433      | 4.85E-08 *      |
|                                                                                                                                                  | No pet dog ^^ | 72.6%<br>204   | 13.9%<br>39  | 13.5%<br>38  | 281      |                 |
| Enjoyment (Q12)                                                                                                                                  | Overall       | 4.2%<br>30     | 20.7%<br>147 | 75.1%<br>534 | 711      | 0.00003 *       |
|                                                                                                                                                  | Under 18      | 1.0%<br>3      | 13.6%<br>39  | 85.4%<br>244 | 711      | 0.000001*       |
|                                                                                                                                                  | Over 18       | 5.2%<br>10     | 27.6%<br>53  | 67.2%<br>129 |          |                 |
|                                                                                                                                                  | Caregivers    | 7.3%<br>17     | 23.6%<br>55  | 69.1%<br>161 |          |                 |
|                                                                                                                                                  | Pet dog       | 1.9%<br>8      | 16.4%<br>71  | 81.7%<br>353 | 432      | 1.97E-09 *      |
|                                                                                                                                                  | No pet Dog    | 7.9%<br>22     | 27.2%<br>76  | 64.9%<br>181 | 279      |                 |

\*  $p < 0.05$  statistical significance criterion.

\*\* Orthodontic patients who are minors under 18 (Under 18). Adult orthodontic patients over 18 (Over 18). Caregivers include parents and legal guardians of orthodontic patients who are minors (Caregivers).

^ Number of participants for each subgroup

^^ Participants with a pet dog at home (pet dog) or without a pet dog at home (no pet dog)

**Table S3:** Corah Dental and Orthodontic Modified Anxiety Scales Numerical

|                |            | Corah Dental DAS <sup>^^</sup> |        |       |                   | Orthodontic Modified DAS <sup>^ ^</sup> |        |       |                   |
|----------------|------------|--------------------------------|--------|-------|-------------------|-----------------------------------------|--------|-------|-------------------|
| Group          | <i>n</i> ^ | Mean +/- SE                    | Median | Range | <i>p</i> -value * | Mean +/- SE                             | Median | Range | <i>p</i> -value * |
| All            | 664 ^      | 8.49 +/- 0.13 **               | 8      | 4-20  |                   | 7.76+/-0.12 **                          | 7      | 4-20  |                   |
| Gender         |            |                                |        |       | <0.0001 *         |                                         |        |       | 0.0003 *          |
| Male           | 224        | 7.77+/- 0.19                   | 7      | 4-19  |                   | 7.16+/-0.18                             | 6.5    | 4-17  |                   |
| Female         | 432        | 8.89 +/- 0.17                  | 9      | 4-20  |                   | 8.09+/-0.16                             | 7      | 4-20  |                   |
| Age group      |            |                                |        |       | 0.0324 *          |                                         |        |       | 0.0012 *          |
| Under 18       | 266        | 8.26+/-0.20                    | 8      | 4-20  |                   | 7.56+/-0.18                             | 7      | 4-17  |                   |
| Over 18        | 174        | 8.24+/-0.23                    | 8      | 4-18  |                   | 7.29+/-0.22                             | 7      | 4-17  |                   |
| Caregivers     | 224        | 8.96+/-0.24                    | 9      | 4-20  |                   | 8.36+/-0.22                             | 8      | 4-20  |                   |
| Dog/No Dog     |            |                                |        |       | 0.1300            |                                         |        |       | 0.0281 *          |
| Dog present    | 278        | 8.73+/-0.20                    | 8      | 4-20  |                   | 8.08+/-0.20                             | 7      | 4-20  |                   |
| No dog present | 401        | 8.33+/-0.17                    | 8      | 4-19  |                   | 7.54+/-0.15                             | 7      | 4-20  |                   |

\*  $p < 0.05$  statistical significance criterion.

\*\* Mean DAS score for each group, plus or minus standard error. Dental Anxiety Scales (DAS) are summed (4 questions, 1-5 points each) to determine anxiety level (< 8 limited, 9-12 moderate, 13-14 high, and 15-20 severe).

^ Number of participants for each subgroup

^^ Dental anxiety DAS score (dental). Orthodontic modified anxiety DAS score (orthodontic).

**Table S4:** COVID-19 concerns regarding contraction of virus

| After the outbreak of COVID-19, how concerned are you about contracting the virus in general (Q32), in a dental or orthodontic office (Q33), or from a dog as a vector for transmission (Q35)? |               |                      |                      |            |                 |
|------------------------------------------------------------------------------------------------------------------------------------------------------------------------------------------------|---------------|----------------------|----------------------|------------|-----------------|
|                                                                                                                                                                                                |               | Little to No Concern | Med to Large Concern | <i>n</i> ^ | <i>p</i> -Value |
| Contraction of Virus in General (Q32)                                                                                                                                                          | Overall       | 57.7%<br>326 ^       | 42.3%<br>239 ^       | 565 ^      | 0.0794          |
|                                                                                                                                                                                                | Under 18 **   | 64%<br>106           | 36%<br>60            | 166        |                 |
|                                                                                                                                                                                                | Over 18 **    | 52%<br>89            | 48%<br>83            | 172        |                 |
|                                                                                                                                                                                                | Caregivers ** | 58%<br>131           | 42%<br>96            | 227        |                 |
| Contraction of a virus in a Dental or Orthodontic office (Q33)                                                                                                                                 | Overall       | 73%<br>410           | 27%<br>152           | 562        | 0.9466          |
|                                                                                                                                                                                                | Under 18      | 75%<br>123           | 25%<br>41            | 164        |                 |
|                                                                                                                                                                                                | Over 18       | 71%<br>121           | 29%<br>50            | 171        |                 |
|                                                                                                                                                                                                | Caregivers    | 73%<br>166           | 27%<br>61            | 227        |                 |
| Contraction of the virus from a dog (Q35)                                                                                                                                                      | Overall       | 88.2%<br>493         | 11.8%<br>66          | 559        | 0.4122          |
|                                                                                                                                                                                                | Under 18      | 91%<br>146           | 9%<br>15             | 161        |                 |
|                                                                                                                                                                                                | Over 18       | 86%<br>147           | 14%<br>24            | 171        |                 |
|                                                                                                                                                                                                | Caregivers    | 88%<br>200           | 12%<br>27            | 227        |                 |

\*  $p < 0.05$  statistical significance criterion.

\*\* Orthodontic patients who are minors under 18 (Under 18). Adult orthodontic patients over 18 (Over 18). Caregivers include parents and legal guardians of orthodontic patients who are minors (Caregivers).

^ Number of participants for each subgroup

**Table S5:** Impact of COVID-19 on stress and AAT

| After the outbreak of COVID-19, how has your day-to-day stress changed? (Q29)<br>How do you think a therapy dog in a dental office would change anxiety levels related to COVID-19? (Q34) |               |                |                |              |            |                 |
|-------------------------------------------------------------------------------------------------------------------------------------------------------------------------------------------|---------------|----------------|----------------|--------------|------------|-----------------|
|                                                                                                                                                                                           |               | Increase       | No Impact      | Reduce       | <i>n</i> ^ | <i>p</i> -Value |
| Day-to-Day Stress (Q29)                                                                                                                                                                   | Overall       | 72.2%<br>410 ^ | 22.0%<br>125 ^ | 5.8%<br>33 ^ | 568 ^      | 0.00006 *       |
|                                                                                                                                                                                           | Under 18 **   | 57.7%<br>97    | 32.8%<br>55    | 9.5%<br>16   | 168        |                 |
|                                                                                                                                                                                           | Over 18 **    | 79.8%<br>138   | 14.4%<br>25    | 5.8%<br>10   | 173        |                 |
|                                                                                                                                                                                           | Caregivers ** | 77.1%<br>175   | 19.8%<br>45    | 3.1%<br>7    | 227        |                 |
| Therapy Dog's Effect on Stress (Q34)                                                                                                                                                      | Overall       | 8.6%<br>48     | 16.8%<br>94    | 74.6%<br>417 | 559        | 0.3675          |
|                                                                                                                                                                                           | Under 18      | 8.0%<br>13     | 14.1%<br>23    | 77.9%<br>127 | 163        |                 |
|                                                                                                                                                                                           | Over 18       | 7.1%<br>12     | 17.6%<br>30    | 75.3%<br>128 | 170        |                 |
|                                                                                                                                                                                           | Caregivers    | 10.2%<br>23    | 18.1%<br>41    | 71.7%<br>162 | 226        |                 |

\*  $p < 0.05$  statistical significance criterion.

\*\* Orthodontic patients who are minors under 18 (Under 18). Adult orthodontic patients over 18 (Over 18). Caregivers include parents and legal guardians of orthodontic patients who are minors (Caregivers).

^ Number of participants for each subgroup

**Table S6:** Feelings towards going to a dental office after the COVID-19 pandemic

| After the outbreak of COVID-19, how do you feel about going to the dentist (Q37) or orthodontist (Q38)? |                |                |              |              |             |            |                 |
|---------------------------------------------------------------------------------------------------------|----------------|----------------|--------------|--------------|-------------|------------|-----------------|
|                                                                                                         | Relaxed        | Uneasy         | Tense        | Anxious      | Feel Sick   | <i>n</i> ^ | <i>p</i> -Value |
| Dentist (Q37)                                                                                           | 38.2%<br>216 ^ | 44.4%<br>251 ^ | 8.7%<br>49 ^ | 7.6%<br>43 ^ | 1.1%<br>6 ^ | 565 ^      | 0.1735          |
| Orthodontist (Q38)                                                                                      | 40.3%<br>227   | 44.9%<br>253   | 8.1%<br>45   | 6.2%<br>35   | 0.5%<br>3   | 563        |                 |

\*  $p < 0.05$  statistical significance criterion.

^ Number of participants for each subgroup

**Table S7:** Concerns related to Animal Assisted Activity (AAA) Pre- and Post-Pandemic Shutdown

| When thinking about a therapy dog in a dental setting, how much concern would you have for each of the following? (Q10) |               |                      |                         |            |                 |
|-------------------------------------------------------------------------------------------------------------------------|---------------|----------------------|-------------------------|------------|-----------------|
|                                                                                                                         |               | Little to No Concern | Medium to Large Concern | <i>n</i> ^ | <i>p</i> -Value |
| Cleanliness                                                                                                             | Pre-shutdown  | 85.0%<br>91 ^        | 15.0%<br>16 ^           | 107 ^      | 0.201           |
|                                                                                                                         | Post-shutdown | 83.2%<br>153         | 16.8%<br>31             | 184        |                 |
| Allergies                                                                                                               | Pre-shutdown  | 75.5%<br>80          | 24.5%<br>26             | 106        | 0.245           |
|                                                                                                                         | Post-shutdown | 81.5%<br>150         | 18.5%<br>34             | 184        |                 |
| Safety                                                                                                                  | Pre-shutdown  | 88.7%<br>94          | 11.3%<br>12             | 106        | 0.300           |
|                                                                                                                         | Post-shutdown | 90.2%<br>166         | 9.8%<br>18              | 184        |                 |

\*  $p < 0.05$  statistical significance criterion.

^ Number of participants for each subgroup. The responses collected before the pandemic shutdown were from patients under the age of 18. Therefore, comparisons are between minor patients before (Pre-shutdown) and after the pandemic shutdown (Post-shutdown).

**Table S8:** Multiple Comparison Test (MCT) Results by Group

|                                                                                                                                  | Pairs       |               | <i>p</i> -Value * |
|----------------------------------------------------------------------------------------------------------------------------------|-------------|---------------|-------------------|
| If you were making a choice between two similar orthodontic practices, would the presence of a dog matter to you? (Q19)          | Under 18 ** | Over 18 **    | 0.0537            |
|                                                                                                                                  | Under 18    | Caregivers ** | 0.0537            |
|                                                                                                                                  | Over 18     | Caregivers    | 0.8523            |
| If answered "yes" above, which practice would you pick? (Q20)                                                                    | Under 18    | Over 18       | 0.1327            |
|                                                                                                                                  | Under 18    | Caregivers    | 0.0526            |
|                                                                                                                                  | Over 18     | Caregivers    | 0.7063            |
| Corah Dental Anxiety Category (Q21-24)                                                                                           | Under 18    | Over 18       | 0.5398            |
|                                                                                                                                  | Under 18    | Caregivers    | 0.0265 *          |
|                                                                                                                                  | Over 18     | Caregivers    | 0.0197 *          |
| Orthodontic Anxiety Category (Q25-28)                                                                                            | Under 18    | Over 18       | 0.2423            |
|                                                                                                                                  | Under 18    | Caregivers    | 0.0104 *          |
|                                                                                                                                  | Over 18     | Caregivers    | 0.0017 *          |
| In general, how much do you think a therapy dog in a dental office would affect your experience (Q12)?                           | Under 18    | Over 18       | <0.0001 *         |
|                                                                                                                                  | Under 18    | Caregivers    | <0.0001 *         |
|                                                                                                                                  | Over 18     | Caregivers    | 0.9760            |
| After the outbreak of COVID-19, how concerned are you about contracting the virus in general (Q32)?                              | Under 18    | Over 18       | 0.0734            |
|                                                                                                                                  | Under 18    | Caregivers    | 0.4385            |
|                                                                                                                                  | Over 18     | Caregivers    | 0.4385            |
| After the outbreak of COVID-19, how concerned are you about contracting the virus from a dog as a vector for transmission (Q35)? | Under 18    | Over 18       | 0.5482            |
|                                                                                                                                  | Under 18    | Caregivers    | 0.8427            |
|                                                                                                                                  | Over 18     | Caregivers    | 0.8427            |
| After the outbreak of COVID-19, how has your day-to-day stress changed? (Q29)                                                    | Under 18    | Over 18       | 0.0003 *          |
|                                                                                                                                  | Under 18    | Caregivers    | <0.0001 *         |
|                                                                                                                                  | Over 18     | Caregivers    | 0.9969            |
| How do you think a therapy dog in a dental office would change anxiety levels related to COVID-19? (Q34)                         | Under 18    | Over 18       | 0.7970            |
|                                                                                                                                  | Under 18    | Caregivers    | 0.6055            |
|                                                                                                                                  | Over 18     | Caregivers    | 0.6055            |
| Corah Dental DAS                                                                                                                 | Under 18    | Over 18       | 0.0593            |
|                                                                                                                                  | Under 18    | Caregivers    | 0.9391            |
|                                                                                                                                  | Over 18     | Caregivers    | 0.0584            |
| Orthodontic Modified DAS                                                                                                         | Under 18    | Over 18       | 0.0019 *          |
|                                                                                                                                  | Under 18    | Caregivers    | 0.3594            |
|                                                                                                                                  | Over 18     | Caregivers    | 0.0092 *          |

\*  $p < 0.05$  statistical significance criterion. Pair-wise test.

\*\* Orthodontic patients who are minors under 18 (Under 18). Adult orthodontic patients over 18 (Over 18). Caregivers include parents and legal guardians of orthodontic patients who are minors (Caregivers).
